# Supplementary material
Source: PubMed Central journal article supplement (PMC5738927)

Supplemental Figure 2.

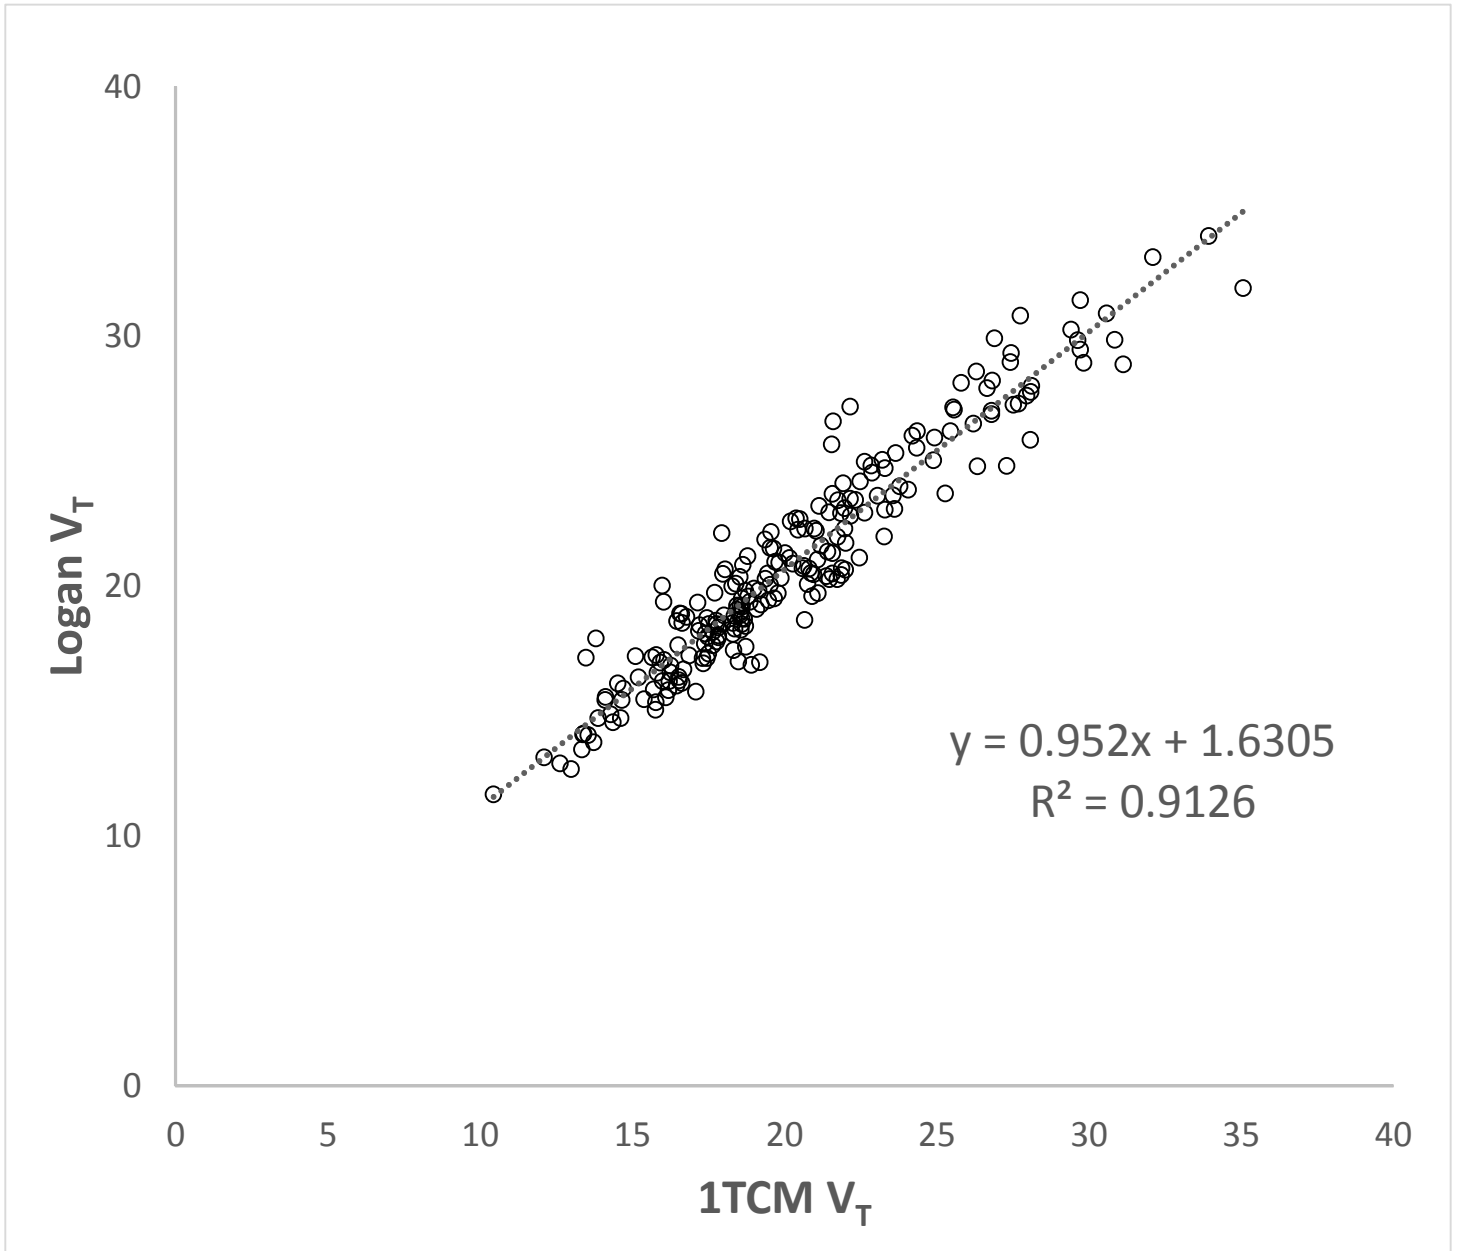

Supplement: NIHMS914017-supplement-3.pdf [file NIHMS914017-supplement-3.pdf]

Supplemental Figure 3.

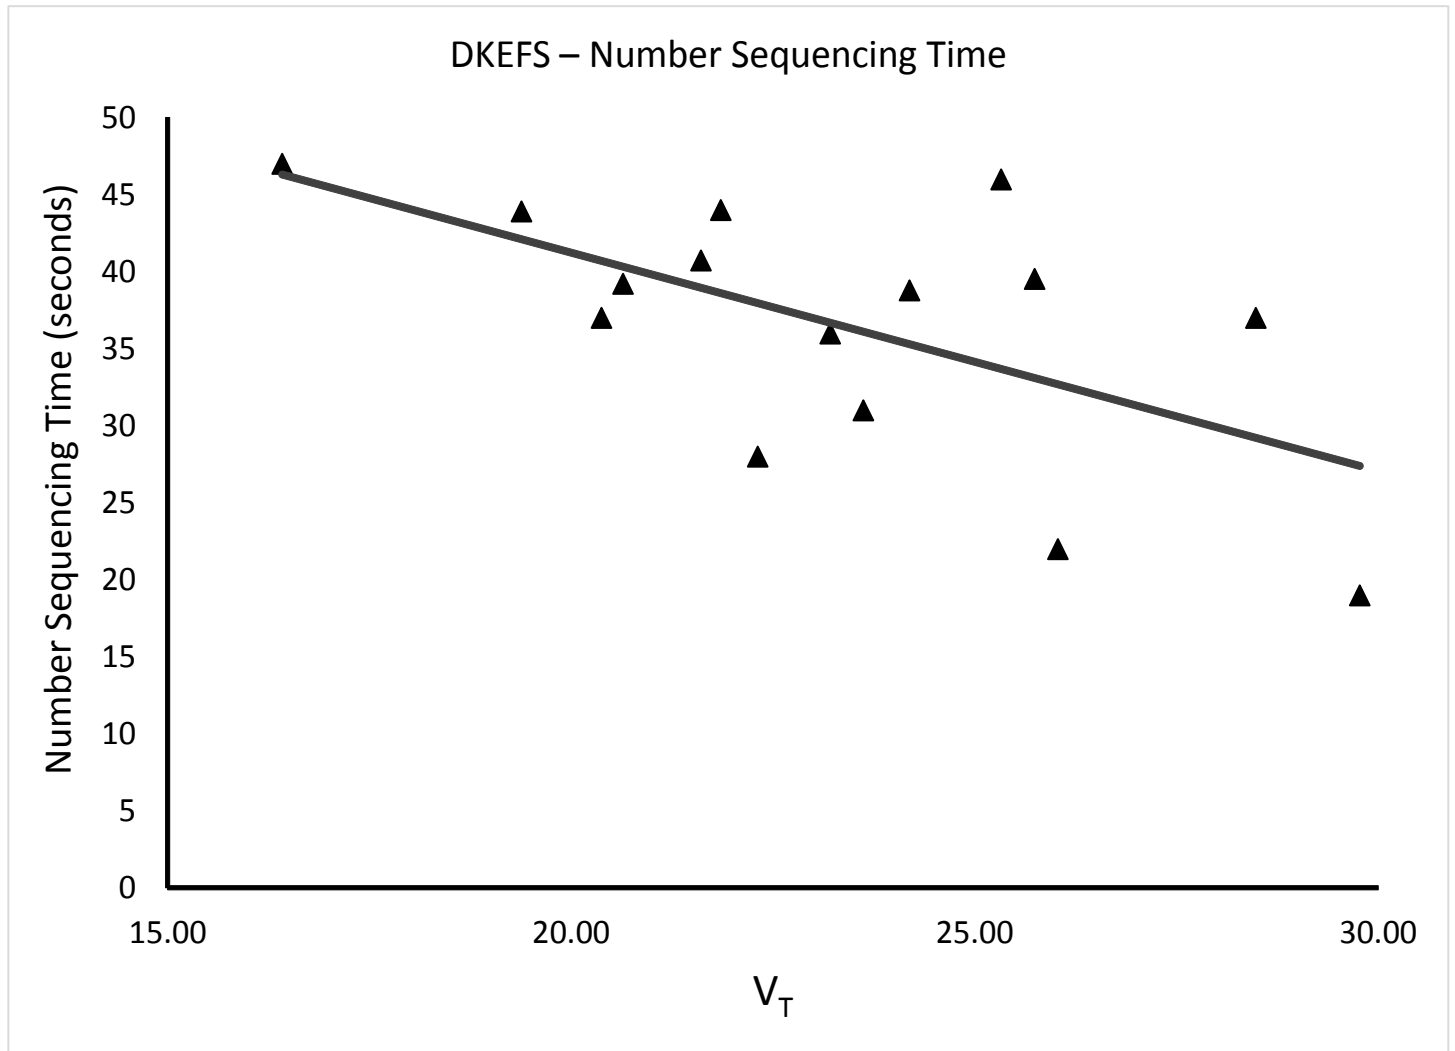

Supplement: NIHMS914017-supplement-4.pdf [file NIHMS914017-supplement-4.pdf]
